# Supplementary material
Source: Springer Nature journal article supplement (https://www.springermedizin.de/resource/supplementary/12933_2012_583_MOESM4_ESM.pdf/9538528)

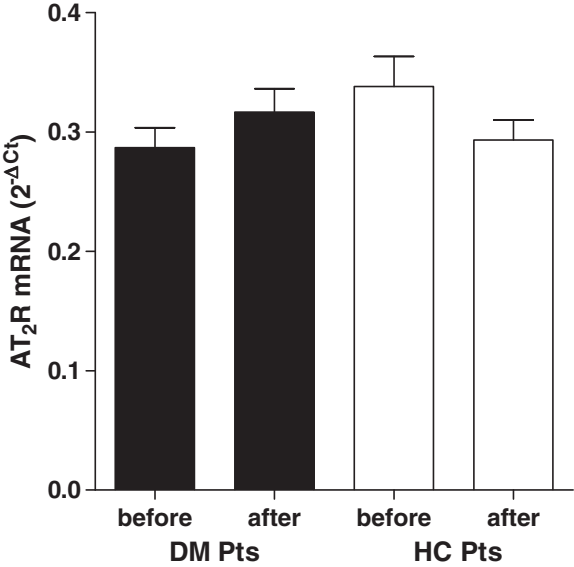

Supplement: MOESM4 [file 9538528]
